# Supplementary material for: High Hydrostatic Pressure in the Modulation of Enzymatic and Organocatalysis and Life under Pressure: A Review
Source: MDPI journal article supplement (doi:10.3390/molecules28104172), 2023-05-18
Supplement: s1 [file s1]

**Table S1** Effect of high pressure on the activity of particular enzymes under pressure (MPa) and temperature (°C).

| Enzyme                                       | Source                                | Substrate                           | Pressure (MPa) | Temperature (°C) | Optimal condition          | Activation volume (ml.mol <sup>-1</sup> )                                                           | Effect                                                                                                                                                                      | Reference |
|----------------------------------------------|---------------------------------------|-------------------------------------|----------------|------------------|----------------------------|-----------------------------------------------------------------------------------------------------|-----------------------------------------------------------------------------------------------------------------------------------------------------------------------------|-----------|
| Alcohol dehydrogenase<br><i>EC 1.1.1.1</i>   | <i>Thermoanaerobium brockii</i>       | 2-pentanol                          | 0.1-200        | 40               | 100 MPa<br>40 °C           | -24                                                                                                 | Activity increase up to 100 MP and decrease for pressure above 100 MPa.                                                                                                     | [23]      |
|                                              |                                       | Cyclopentanol                       |                |                  |                            | -36                                                                                                 |                                                                                                                                                                             |           |
|                                              | <i>Thermoanaerobacter ethanolicus</i> | 2-butanol                           | 0.1-137.5      | 20-52            | <i>N</i>                   | <i>N</i>                                                                                            | Increasing pressure favors the formation of the S enantiomer whereas increasing temperature favors the formation of the R enantiomer                                        | [42]      |
|                                              |                                       | 2-pentanol                          |                |                  |                            | <i>N</i>                                                                                            |                                                                                                                                                                             |           |
|                                              |                                       | 2-hexanol                           |                |                  |                            | +2.0                                                                                                |                                                                                                                                                                             |           |
| Formate dehydrogenase<br><i>EC 1.2.2.1</i>   | <i>Candida boidinii</i>               | Formate                             | 0.1 - 200      | 25 – 45          | <i>N</i>                   | – 9.3                                                                                               | Reaction rate increases with high pressure (0.1 – 200 MPa) by one order of magnitude in neat buffer solution. The addition of TMAO and dextran further doubled this effect. | [43]      |
| Octopine dehydrogenase<br><i>EC 1.5.1.11</i> | Commercial (Sigma)                    | Octopine                            | 0.1-100        | 20               | 60 MPa                     | -16.4                                                                                               | The maximum activity of for octopine synthesis is at 60 MPa.                                                                                                                | [21]      |
| Pectin methylesterase<br><i>EC 3.1.1.11</i>  | <i>Aspergillus aculeatus</i>          | Apple pectin                        | 100-500        | 20-70            | 200, 300 MPa<br>50,55 °C   | <i>N</i>                                                                                            | Increasing activity with elevated pressure and temperature.                                                                                                                 | [46]      |
|                                              | Green pepper                          |                                     | 400-800        | 25,60            | 400-500 MPa<br>25 °C       | <i>N</i>                                                                                            | Maximum activity at 400 and 500 MPa and at 25 °C.                                                                                                                           | [47]      |
|                                              | Carrot                                |                                     | 0.1-500        | 20-65            | 500 MPa<br>50 °C           | -6.98                                                                                               | Above 40 °C, increase in temperature clearly resulted in a gradual increase in Va; activity increased at elevated pressure and temperature up to 50 °C at 500 MPa.          | [48]      |
| β-glucanase<br><i>EC 3.2.1.2</i>             | Barley malt                           | β-glucan                            | 0.1-900        | 30-75            | 215 MPa<br>55 °C<br>pH 5.6 | <i>N</i>                                                                                            | 1.6-fold higher depolymerysation of β-glucan after 20 min as compared to the max. at 0.1 MPa (45 °C).                                                                       | [49]      |
| Cellulase<br><i>EC 3.2.1.4</i>               | <i>Aspergillus niger</i>              | Microcrystalline cellulose (Avicel) | 200-400        | 37               | 300 MPa<br>37 °C           | <i>N</i>                                                                                            | Activity at 300 MPa is 1.5-fold higher than at 0.1 MPa.                                                                                                                     | [55]      |
|                                              |                                       | CM-cellulase                        | 200-400        | 37               | 400 MPa<br>37 °C           | <i>N</i>                                                                                            | Activity at 400 MPa increase 1.7-fold more than at 0.1 MPa.                                                                                                                 |           |
|                                              | <i>Aspergillus niger</i>              | Carboxymethylcellulose              | 0.1-700        | 30               | 400 MPa<br>30 °C           | -6.33 ml mol <sup>-1</sup> (200-400 MPa);<br>1.58 ml mol <sup>-1</sup> (200-600 MPa) in 10%[bmim]Cl | Activity varies from 60-100% at 200-400 MPa. In 10%[bmim]Cl activity of cellulase is 1.7-fold higher (at 100 MPa) than at 0.1 MPa.                                          | [38]      |

|                                              |                                                   |                                                                |           |       |                             |                                                                     |                                                                                                                                                                                                       |      |
|----------------------------------------------|---------------------------------------------------|----------------------------------------------------------------|-----------|-------|-----------------------------|---------------------------------------------------------------------|-------------------------------------------------------------------------------------------------------------------------------------------------------------------------------------------------------|------|
| Naringinase<br><i>EC 3.2.1.40</i>            | Commercial (Sigma Aldrich)                        | <i>p</i> -nitrophenyl $\alpha$ -L-rhamnopyranoside (4-NRham)   | 0.1-200   | 25-80 | 150-200 MPa<br>70-80 °C     | -7.7 ( $\alpha$ -L-rhamnopyranoside)<br>-20 $\pm$ 5.2 (naringinase) | 3-fold and 4-fold increase in naringinase thermostability at 150 MPa and 70-80 °C, respectively, compared to 0.1 MPa; 15-fold increase of kcat/Km values from 0.1 MPa and 30 °C to 150 MPa and 70 °C. | [36] |
|                                              |                                                   | <i>p</i> -nitrophenyl $\beta$ -D-glucopyranoside (4-NGluc)     |           |       |                             |                                                                     |                                                                                                                                                                                                       |      |
|                                              |                                                   | Naringin                                                       | 0.1-160   | 30    | 160 MPa<br>30 °C            | -15                                                                 | Hydrolysis of naringin is accelerated at 80 MPa (5% increase) but at 160 MPa achieve maximum of activity (a 20% increase) in comparison at 0.1 MPa.                                                   | [58] |
|                                              |                                                   |                                                                | 0.1-200   | 25-60 | 160 MPa<br>30-40 °C         | -9                                                                  | 2-fold increase with maximum activity at 160 MPa and at 35-40 °C.                                                                                                                                     | [59] |
|                                              |                                                   |                                                                | 80-216    | 13-61 | 158 MPa<br>41 °C<br>pH 4.0  | <i>N</i>                                                            | Higher naringinase activity obtained at higher pressure and temperature with maximum activity at 41 °C and 158 MPa.                                                                                   | [60] |
| $\alpha$ -Chymotrypsin<br><i>EC 3.4.21.1</i> | Bovine pancreas                                   | N-succinyl-L-phenylalanine- <i>p</i> -nitroanilide             | 0.1-500   | 20-50 | 470 MPa<br>20 °C            | -10                                                                 | 6.5-fold higher rate up to 470 MPa at 20 °C than at 20 °C under 0.1 MPa                                                                                                                               | [7]  |
|                                              |                                                   |                                                                |           |       | 360 MPa<br>50 °C            | -25                                                                 | 30-fold higher rate at 50 °C and 360 MPa than at 20 °C under 0.1 MPa.                                                                                                                                 |      |
|                                              | Commercial (Sigma-Aldrich)                        | N-succinyl-L-phenylalanine- <i>p</i> -nitroanilide             | 0.1 - 200 | 20    | <i>N</i>                    | -15                                                                 | Increase in activity with the increase in pressure until 200 MPa in pure buffer and for most co-solvents.                                                                                             | [62] |
|                                              | Commercial, immobilized on silica (Sigma-Aldrich) | Ala-Ala-Phe-7-amido-4-methylcoumarin                           | 0.1 - 200 | 20    | <i>N</i>                    | 0 to -14                                                            | Product formation was increased at all pressures (up until an 8-fold increase), when compared to the reactions done under pressure with free enzyme.                                                  | [63] |
| Trypsin<br><i>EC 3.4.21.4</i>                | Commercial (Boehringer Mannheim)                  | $\alpha$ -N-benzoyl-L-arginino- <i>p</i> -nitroanilid (L-BAPA) | 0.1-100   | 20    | 43 MPa                      | - 8.8                                                               | Positive effect of pressure on reaction rate up to 43 MPa.                                                                                                                                            | [21] |
|                                              | Commercial                                        | BzArgOEt (N-benzoyl-L- arginine ethyl ester)                   | 0.1-100   | 25    | 100 MPa<br>25 °C            | -2.4                                                                | Activity increases up to 100 MPa.                                                                                                                                                                     | [65] |
|                                              | Commercial (Sigma)                                | $\beta$ -lactoglobulin A ( $\beta$ -Ig A)                      | 0-1 - 400 | 37    | <i>N</i>                    | <i>N</i>                                                            | Pressurization up to 400 MPa, before or during enzyme action, enhanced tryptic hydrolysis of $\beta$ -Ig A.                                                                                           | [64] |
| Thermolysin<br><i>EC 3.4.24.27</i>           | <i>Bacillus thermoproteolyticus</i>               | 3-(2-furylacryloyl)-glycyl-L-leucine amide                     | 0.1-100   | 25    | 100 Mpa<br>25 °C<br>6 -7 pH | -58                                                                 | Activity results in over 13-fold acceleration at 100 MPa.                                                                                                                                             | [22] |

|  |                           |                                                      |         |       |                            |                                                                                                        |                                                                                                                                                                                  |      |
|--|---------------------------|------------------------------------------------------|---------|-------|----------------------------|--------------------------------------------------------------------------------------------------------|----------------------------------------------------------------------------------------------------------------------------------------------------------------------------------|------|
|  |                           | (Dipeptide substrate<br>FA-Gly-Leu-NH <sub>2</sub> ) | 0.1-400 | 20-80 | 250 MPa<br>40 °C<br>7.2 pH | -44 (at 20 °C up to<br>100 MPa)<br>-48 (at 40 °C)<br>-52.4 (at 60 °C)                                  | At 20 °C up to 100 MPa a significant 15-fold increase of reaction rate;<br>simultaneous increase of temperature and pressure leads to<br>acceleration of reaction up to 40-fold. | [22] |
|  | <i>Daiwa Kasei</i> /Sigma | Dipeptide substrate<br>Fua-Gly-NeuNH <sub>2</sub>    | 0.1-300 | 7-47  | 220 MPa                    | -53, -71, -86, -95<br>ml mol <sup>-1</sup> at<br>10, 25, 35 and<br>45 °C respectively<br>(0.1-100 MPa) | Maximum rate at around 220 MPa; at 300 MPa reaction rate is 30-<br>fold more than at 0.1 MPa.                                                                                    | [67] |
|  |                           | Heptapeptide substrate<br>MeOcAc-peptide             |         |       | 120 MPa                    | <i>N</i>                                                                                               | Maximum rate at around 120 MPa with 6-fold higher activity than at<br>0.1 MPa. At 300 MPa, 2-fold increase comparing with 0.1 MPa.                                               |      |

*N*- no information
